# Supplementary material for: Development of the expression and prognostic significance of m5C‐related LncRNAs in breast cancer
Source: PubMed Central journal article supplement (PMC10067052; doi:10.1002/cam4.5500), 2022-12-04

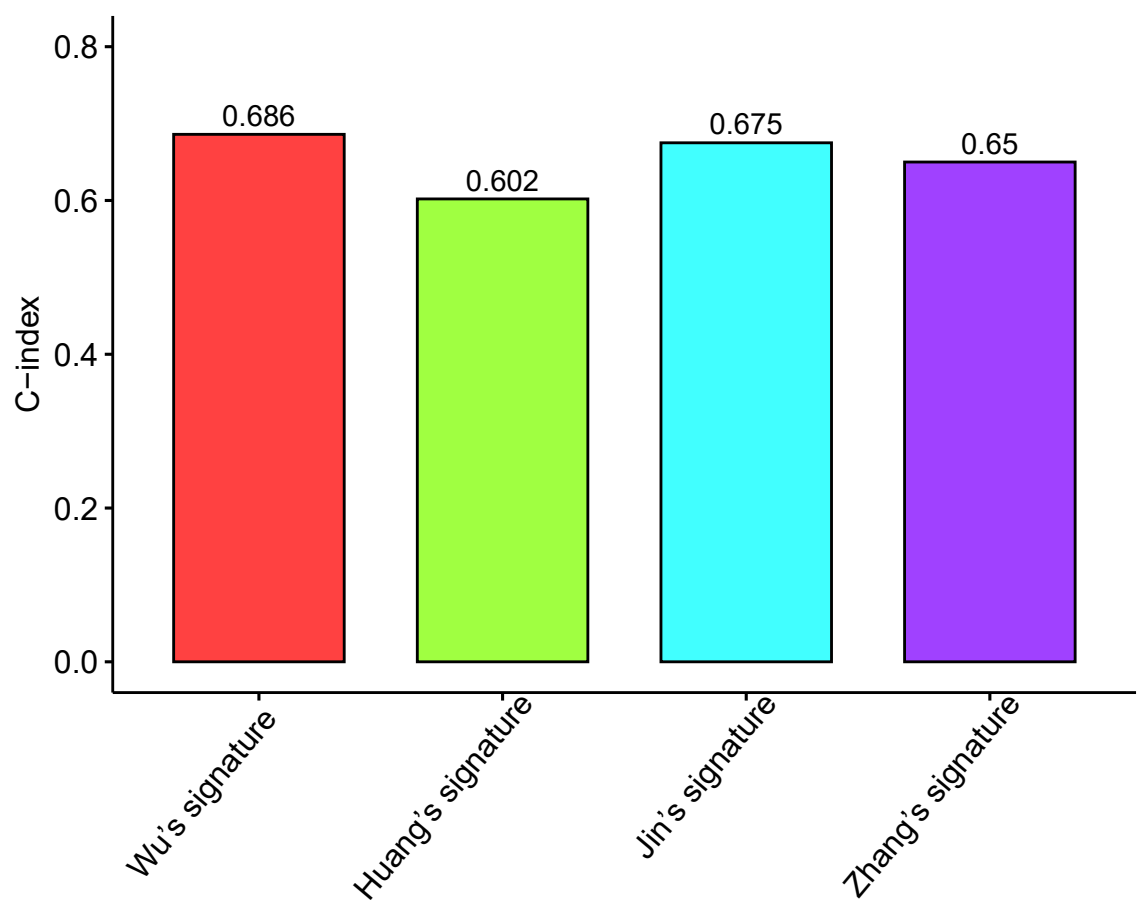

Supplement: CAM4-12-7667-s002.pdf [file CAM4-12-7667-s002.pdf]
